# Supplementary material for: Cardiac-specific microRNA-125b deficiency induces perinatal death and cardiac hypertrophy
Source: PubMed Central journal article supplement (PMC7840921; doi:10.1038/s41598-021-81700-y), 2021-01-27
Supplement: 41598_2021_81700_MOESM1_ESM.pdf [file 41598_2021_81700_MOESM1_ESM.pdf]

**Supplementary information**

**Cardiac-specific MicroRNA-125b deficiency induces perinatal death and  
cardiac hypertrophy**

Chen-Yun Chen<sup>1,3</sup>, Desy S. Lee<sup>1</sup>, Oi Kuan Choong<sup>1</sup>, Sheng-Kai Chang<sup>2</sup>, Tien Hsu<sup>3</sup>,  
Martin W. Nicholson<sup>1</sup>, Li-Wei Liu<sup>1</sup>, Po-Ju Lin<sup>1</sup>, Shu-Chian Ruan<sup>1</sup>, Shu-Wha Lin<sup>2</sup>, Chung-Yi Hu<sup>2</sup>,  
Patrick C.H. Hsieh<sup>1, 4-5\*</sup>

<sup>1</sup>Institute of Biomedical Science, Academia Sinica, Taipei 115, Taiwan

<sup>2</sup>Department of Clinical Laboratory Sciences and Medical Biotechnology, College of Medicine,  
National Taiwan University, Taipei 100, Taiwan

<sup>3</sup>Department of Biomedical Sciences and Engineering, National Central University, Taoyuan 320,  
Taiwan

<sup>4</sup>Institute of Medical Genomics and Proteomics, National Taiwan University College of Medicine,  
Taipei 100, Taiwan

<sup>5</sup>Institute of Clinical Medicine, National Taiwan University College of Medicine, Taipei 100, Taiwan

**Supplementary:** 11 figures, 2 tables

## Figure S1

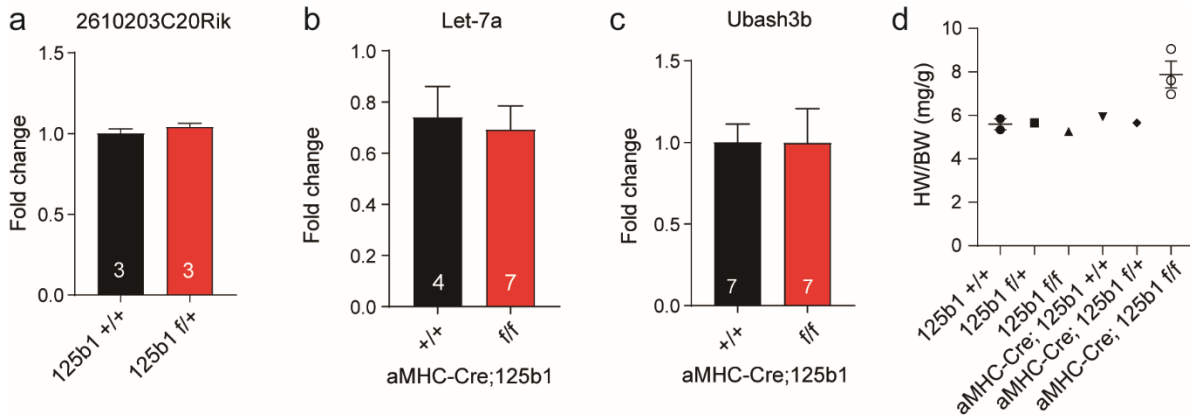

**Figure S1.** The effect of the loxP insertion on host and neighbor gene expression and mouse phenotypes. (a) The expression of 2610203C20Rik in miR-125b-1 +/+ and miR-125b-1 f/+ littermates. RNAs were extracted from 2-week-old mouse hearts. (n=3 for each group,  $p=0.3284$  for Student *t* test). (b) Let-7a expression in control and miR-125b-1 knockout neonatal hearts. (n=4 vs. 7,  $p=0.7623$  for Student *t* test). (c) Ubash3b expression in control and miR-125b-1 knockout neonatal hearts. (n=7 for each group,  $p=0.9889$  for Student *t* test). (d) Heart weight-to-body weight ratio from 6-month-old adult littermates.

**Figure S2**

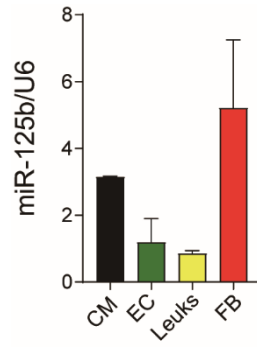

**Figure S2.** MiR-125b expression in different cells types from adult hearts. CM: cardiomyocyte; EC: endothelial cell; Leuks: leukocytes; FB: fibroblasts (n=2).

**Figure S3**

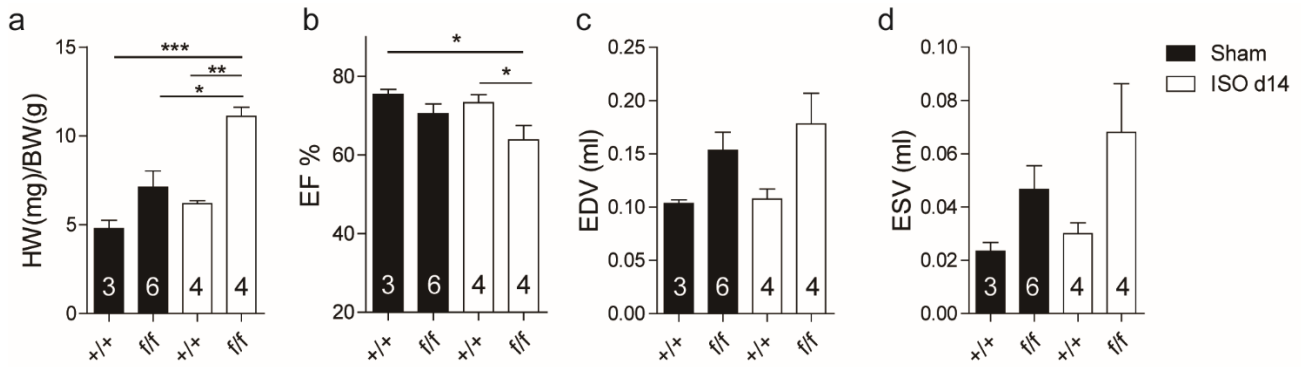

**Figure S3.** Cardiac-specific miR-125b knockout mice were more susceptible to treatment with isoproterenol. **(a)** The ratio of heart weight-to-body weight in the control and knockout mice with or without isoproterenol treatment (n=3, 6, 4 and 4 in control without treatment, knockout without treatment, control with ISO treatment and knockout with ISO treatment group, control sham vs. knockout sham,  $p=0.1653$ ; control sham vs. control ISO,  $p=0.6803$ ; control sham vs. knockout ISO,  $p=0.0008$ ; knockout sham vs. control ISO,  $p=0.7694$ ; knockout sham vs. knockout ISO,  $p=0.0121$ ; control sham vs. knockout ISO,  $p=0.0044$ ). **(b)** The ejection fraction of the control and knockout mice with or without isoproterenol treatment (n=3, 6, 4 and 4 in control without treatment, knockout without treatment, control with ISO treatment and knockout with ISO treatment group, control sham vs. knockout sham,  $p=0.5914$ ; control sham vs. control ISO,  $p=0.9550$ ; control sham vs. knockout ISO,  $p=0.0217$ ; knockout sham vs. control ISO,  $p=0.8550$ ; knockout sham vs. knockout ISO,  $p=0.0872$ ; control sham vs. knockout ISO,  $p=0.0361$ ). **(c)** The end-diastolic volume (n=3, 6, 4 and 4 in control without treatment, knockout without treatment, control with ISO treatment and knockout with ISO treatment group, control sham vs. knockout sham,  $p=0.3946$ ; control sham vs. control ISO,  $p=0.9993$ ; control sham vs. knockout ISO,  $p=0.1321$ ; knockout sham vs. control ISO,  $p=0.3911$ ; knockout sham vs. knockout ISO,  $p=0.7849$ ; control sham vs. knockout ISO,  $p=0.1182$ ) and **(d)** the end-systolic volume of the control and knockout mice with or without isoproterenol treatment (n=3, 6, 4 and 4 in control without treatment, knockout without treatment, control with ISO treatment and knockout with ISO treatment group, control sham vs. knockout sham,  $p=0.5885$ ; control sham vs. control ISO,  $p=0.9860$ ; control sham vs. knockout ISO,  $p=0.1279$ ; knockout sham vs. control ISO,  $p=0.7503$ ; knockout sham vs. knockout ISO,  $p=0.5378$ ; control sham vs. knockout ISO,  $p=0.1710$ ).

**Figure S4**

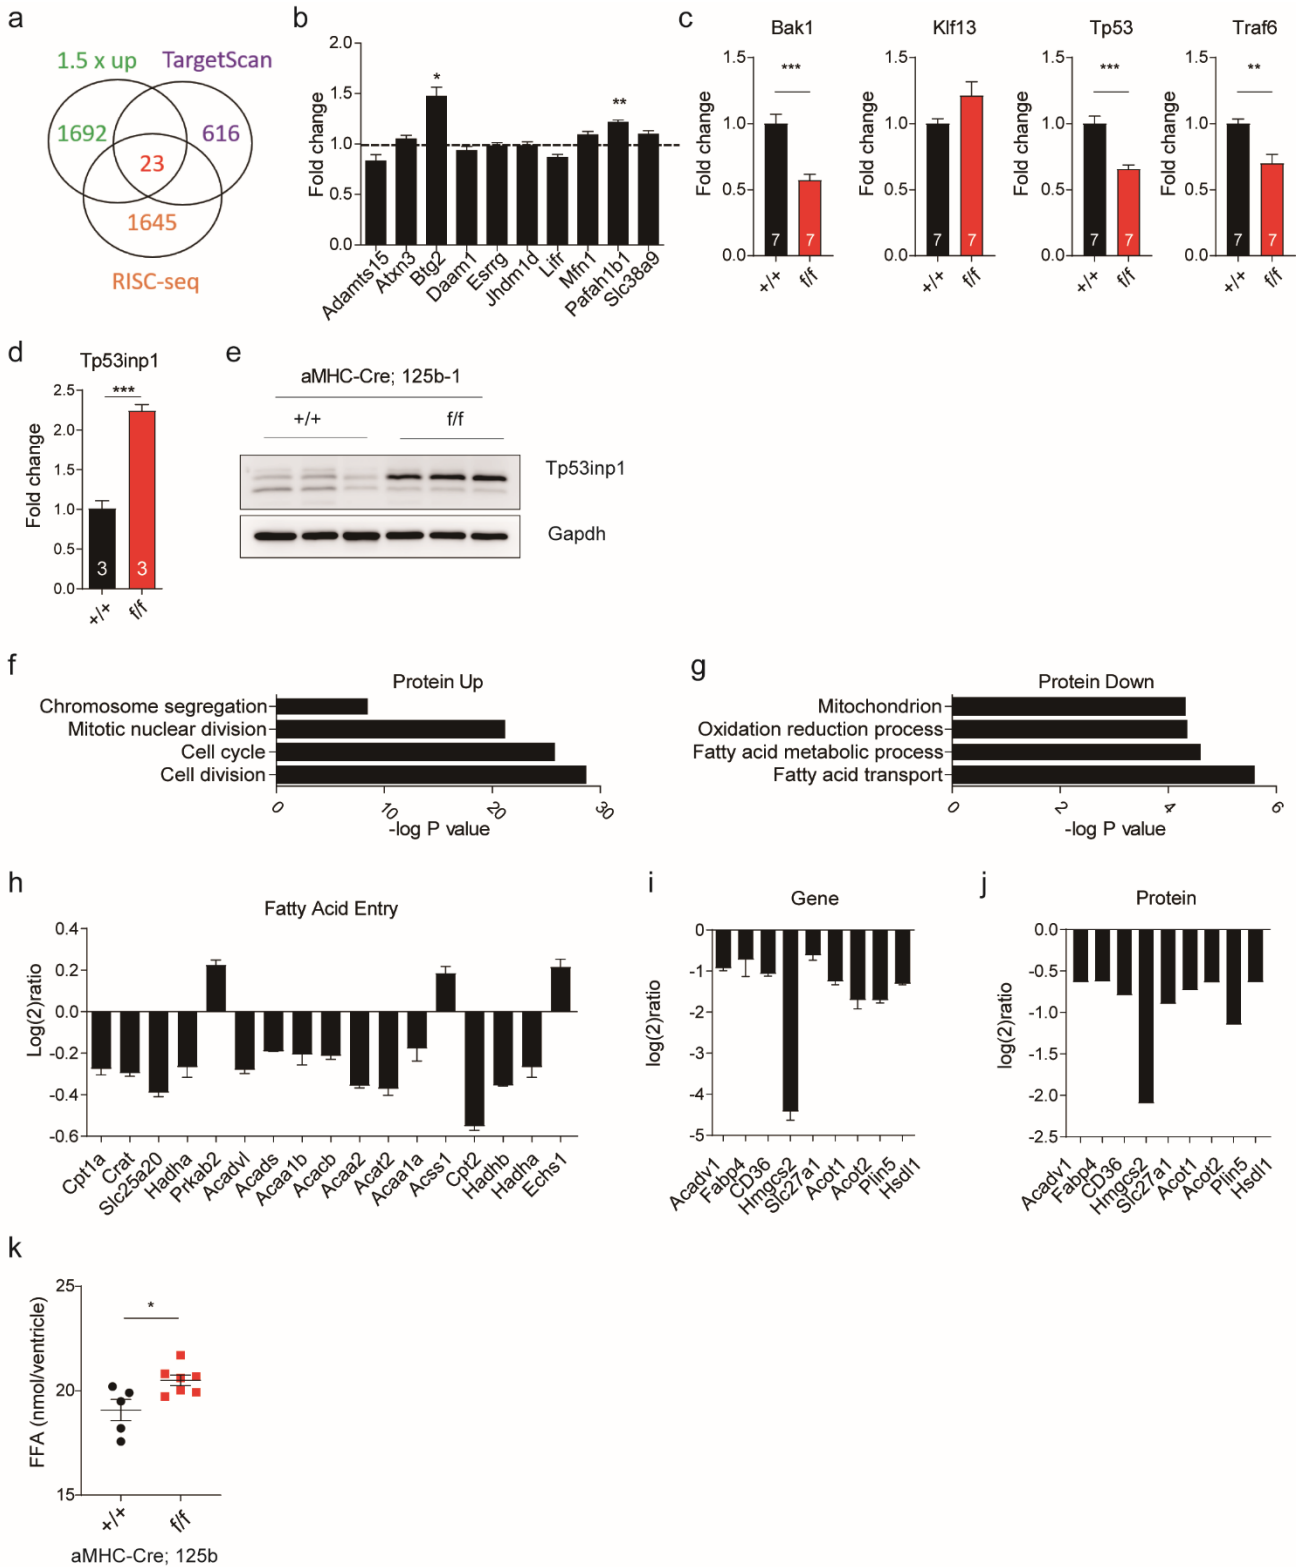

**Figure S4.** Identification of miR-125b downstream target by transcriptome and proteome analysis. **(a)** Identification of potential target genes by Venn diagram. An upregulated database, a heart RISC-seq database and TargetScan 6.0 prediction were used to identify candidate genes. **(b)** Validation of common candidate gene expression after LNA-125b transfection in mouse neonatal cardiomyocytes. The result was from four independent experiments. **(c)** Bak1, Klf13, Tp53 and Traf6 expression in

control and miR-125b deficient ventricles. (n=7 for each group, Bak1  $p=0.0003$ , Klf13  $p=0.0802$ , Tp53  $p=0.0002$ , Traf6  $p=0.0021$  for unpaired Student  $t$  test) **(d)** Tp53inp1 expression in control and miR-125b deficient ventricles. (n=3 for each group,  $p=0.0006$  for unpaired Student  $t$  test) **(e)** Western blot of Tp53inp1 in neonatal hearts. **(f)** GO analysis of upregulated proteins. **(g)** GO analysis of downregulated proteins in the knockout neonatal hearts. **(h)** The expression changes of fatty acid related genes, retrieved from microarray analysis, between miR-125b deficient and control hearts. **(i)** Expression change of nine candidate genes. Bar and error bar indicate mean and SEM; n=3. **(j)** Expression change of nine candidate proteins. Bar indicates mean; n=3. **(k)** Free fatty acid amount in the neonatal hearts (n=5 vs. 7,  $p=0.0209$  for unpaired Student  $t$  test).

**Figure S5**

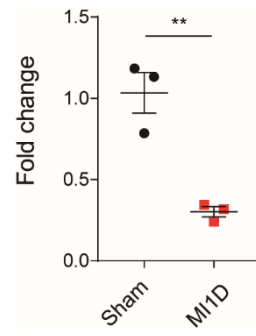

**Figure S5.** MiR-125b expression after myocardial infarction. The expression level of miR-125b in mouse hearts one day after LAD ligation. (n=3,  $p=0.0047$  for unpaired Student  $t$  test)

**Figure S6**

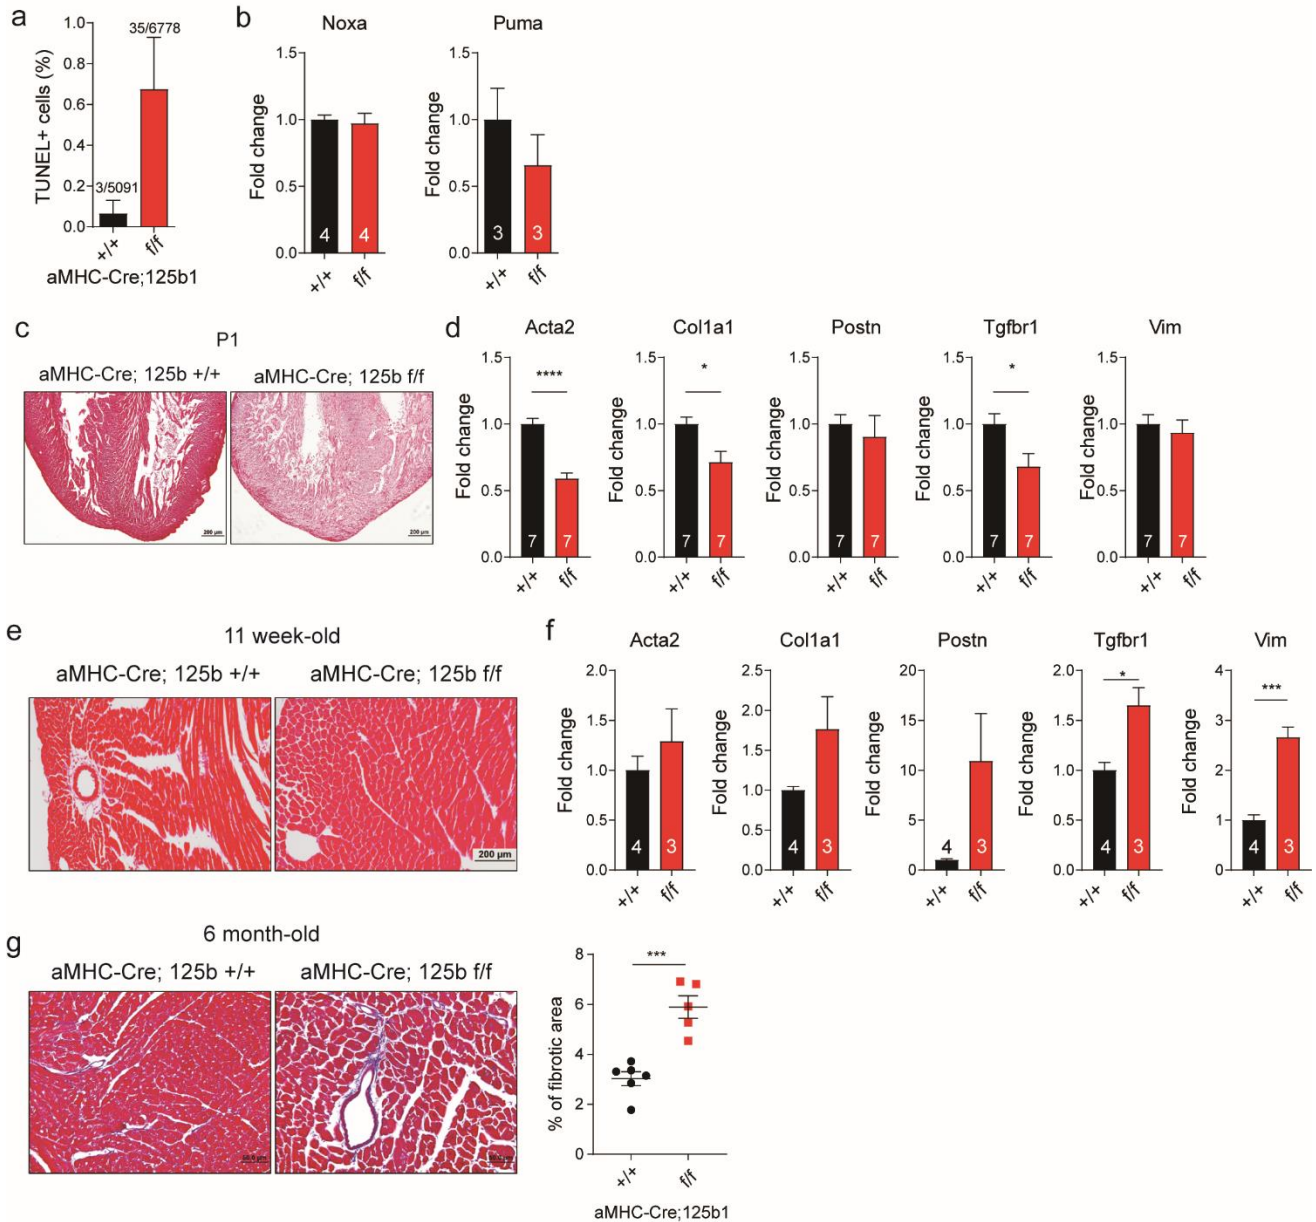

**Figure S6.** Cardiomyocyte apoptosis and fibrosis in miR-125b deficient mice. **(a)** TUNEL staining in neonatal hearts. Only 3 TUNEL positive cells out of a total 5,091 cardiomyocytes found in control neonatal hearts and 35 TUNEL positive cells out of a total 6,778 cardiomyocytes found in miR-125b deficient neonatal hearts (n=3 vs.. 4,  $p=0.1045$  for unpaired Student  $t$  test). **(b)** Expression of Noxa and Puma in miR-125b deficient neonatal hearts (Noxa: n=4 for each group,  $p=0.7411$ ; Puma: n=3 for each group,  $p=0.3568$  for unpaired Student  $t$  test). **(c)** Trichrome staining of neonatal hearts. **(d)** Acta2, Colla1, Postn, Tgfb1 and Vim expression in neonatal hearts (n=7 for each group, Acta2  $p<0.0001$ ; Colla1  $p=0.0126$ ; Postn  $p=0.5953$ ; Tgfb1  $p=0.0254$ ; Vim  $p=0.5468$  for unpaired Student  $t$  test) **(e)** Trichrome staining of 11-week-old mouse hearts. **(f)** Acta2, Colla1, Postn, Tgfb1 and Vim expression in 11-week-old mouse hearts. (n=4 vs. 3, Acta2  $p=0.4077$ ; Colla1  $p=0.6371$ ; Postn  $p=0.0552$ ; Tgfb1  $p=0.0145$ ; Vim  $p=0.0006$  for unpaired Student  $t$  test) **(g)** Trichrome staining of 6-month-old mouse hearts. The fibrotic area was measured by ImageJ. (n=6 vs. 5,  $p=0.0003$  for unpaired Student  $t$  test).



**Figure S7**

Figure 2i

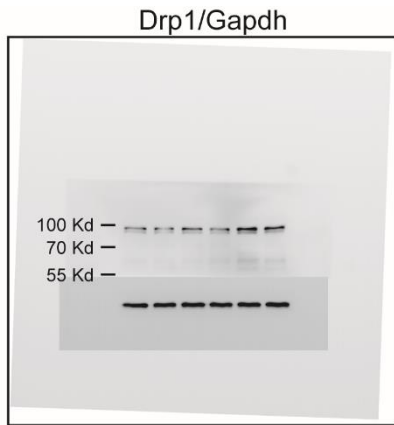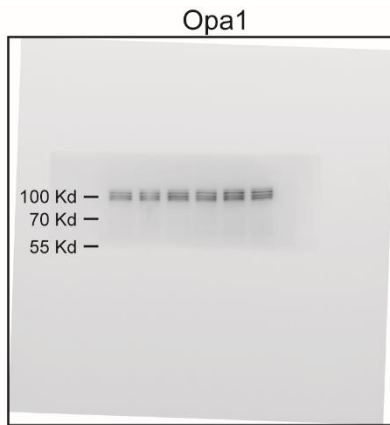

Figure 2j

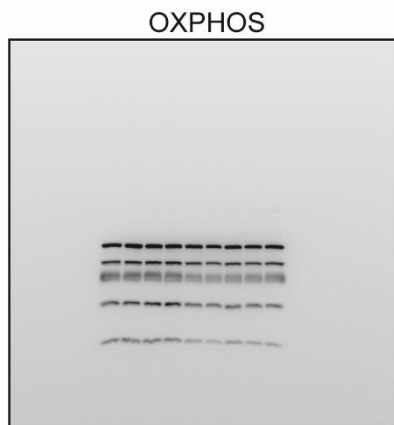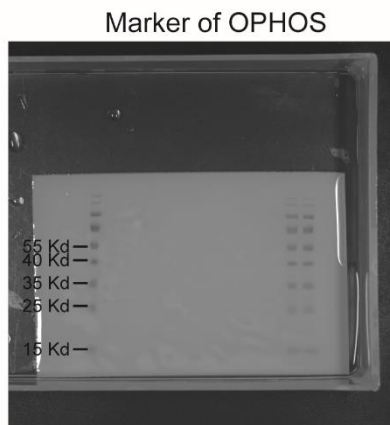

Figure 2n

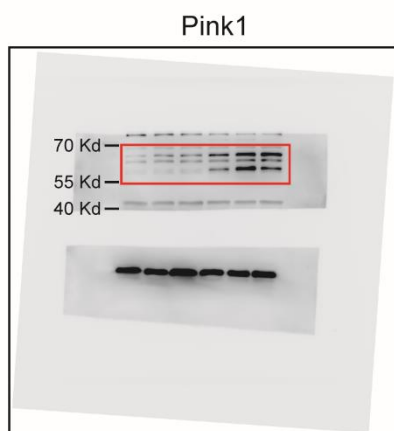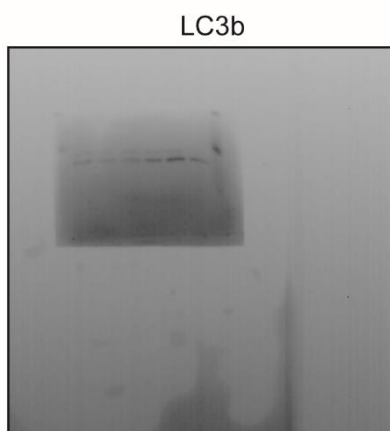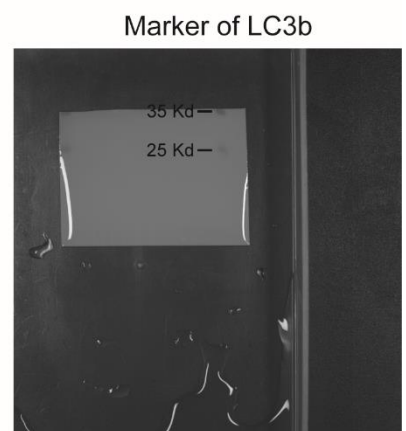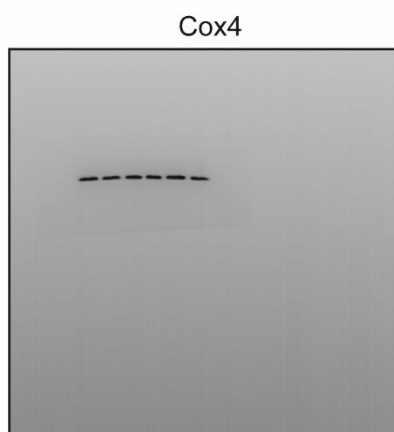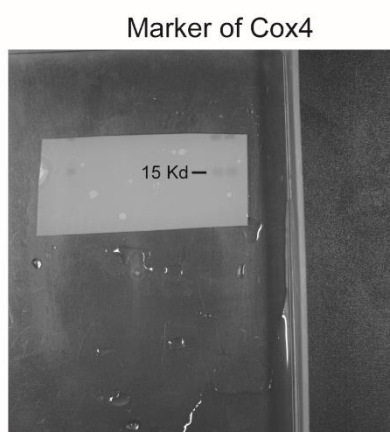

**Figure S7.** The original images of western blot for Figure 2.

**Figure S8**

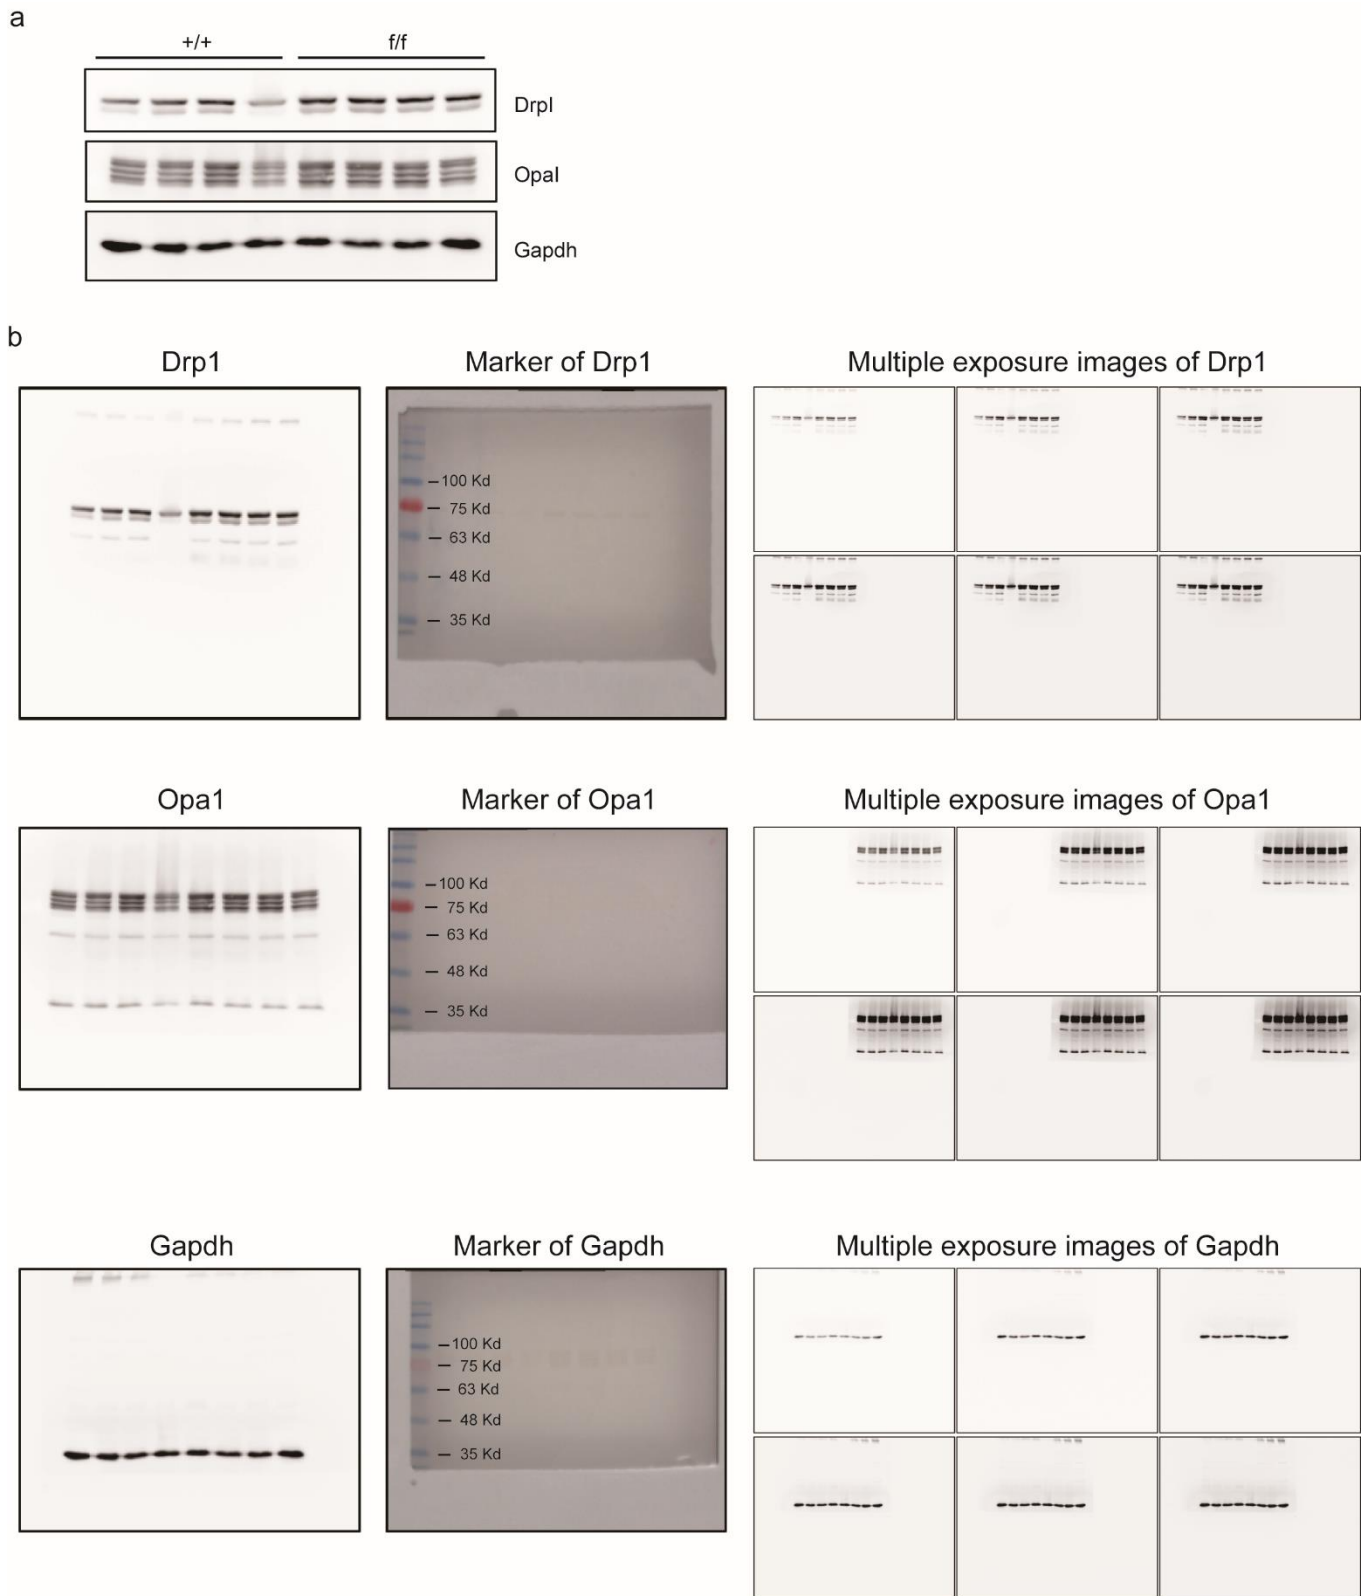

**Figure S8.** Repeat experiment as Figure 2i. **(a)** Western blot of Drp1, Opa1 and Gapdh. Opa1 and Gapdh were from the same blot. Drp1 was from the other blot with the same protein extracts. **(b)** the original images of western blot.

### Figure S9

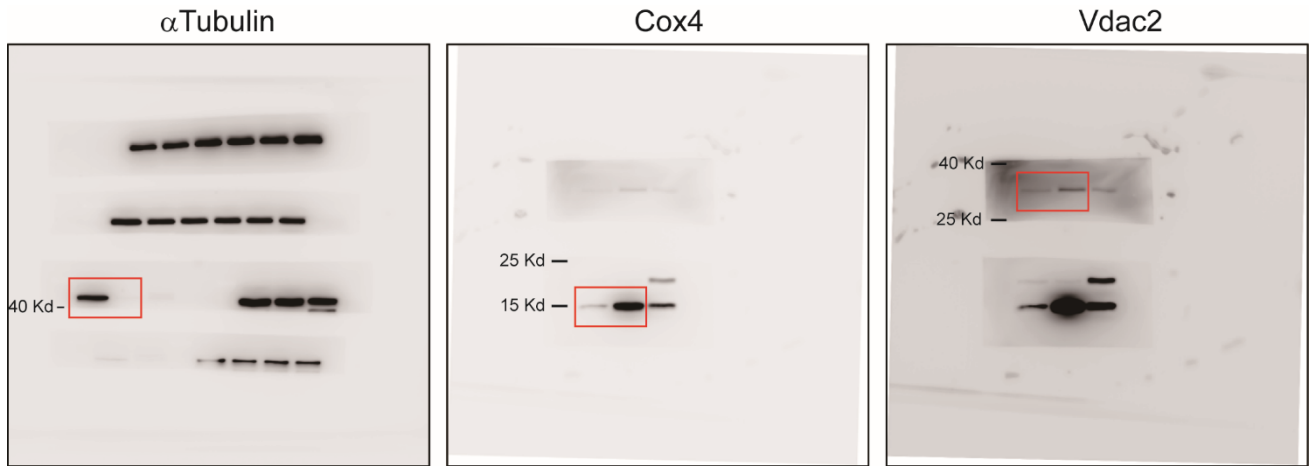

**Figure S9.** The original images of western blot for Figure 4.

**Figure S10**

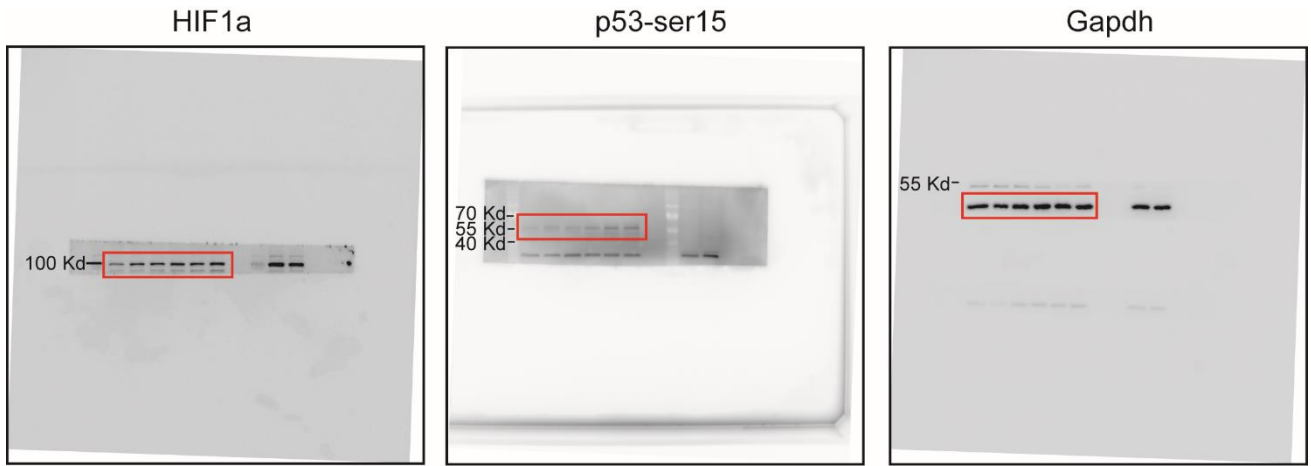

**Figure S10.** The original images of western blot for Figure 6.

### Figure S11

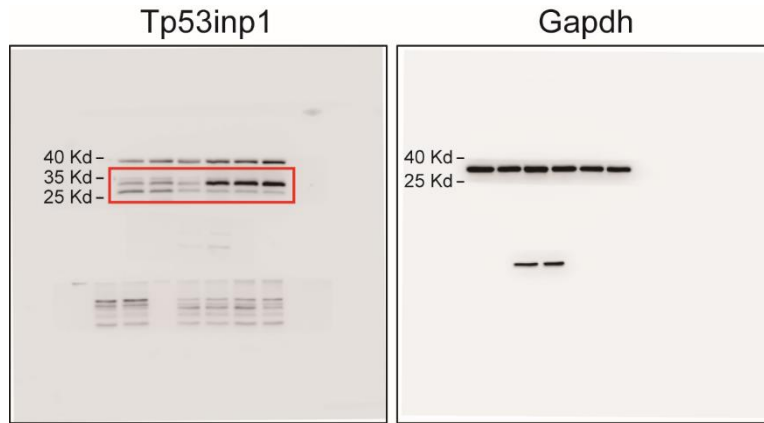

**Figure S11.** The original images of western blot for Figure S4e.

**Table S1. Genotyping primer list**

| Name      | Forward                                                             | Reverse                        |
|-----------|---------------------------------------------------------------------|--------------------------------|
| aMHC-Cre  | GCG GTC TGG CAG TAA AAA CTA TC                                      | GTG AAA CAG CAT TGC TGT CAC TT |
| miR-125b1 | GTT ACA CAC TTC TCA GTT CAG CG                                      | GGA GTG AAA GAA ATA GCT GGG TG |
| Tp53      | mu: CAG CCT CTG TTC CAC ATA CAC T<br>wt: AGG CTT AGA GGT GCA AGC TG | TGG ATG GTG GTA TAC TCA GAG C  |

**Table S2. qPCR primer list**

| Name           | Forward                        | Reverse                             |
|----------------|--------------------------------|-------------------------------------|
| bMHC           | GTG CCA AGG GCC TGA ATG AG     | GCA AAG GCT CCA GGT CTG A           |
| ANP            | CGT CTT GGC CTT TTG GCT TC     | GGT GGT CTA GCA GGT TCT TGA AA      |
| BNP            | CAC CGC TGG GAG GTC ACT        | GTG AGG CCT TGG TCC TTC AAG GTC ACT |
| Acta1          | GAC TCC TCC CTC CCC TCT TA     | GGT GTC TAG TTT CAG AGG CTG G       |
| LC3b           | CGT CCT GGA CAA GAC CAA GT     | ATT GCT GTC CCG AAT GTC TC          |
| Binp3          | TTC CAC TAG CAC CTT CTG ATG A  | GAA CAC CGC ATT TAC AGA ACA A       |
| Gabarap11      | CAT CGT GGA GAA GGC TCC TA     | ATA CAG CTG GCC CAT GGT AG          |
| Sqstm1         | CCA GAA TCG GAA GGG CCA A      | TCA GCC TCT GGT GGG AGA TGT         |
| Adamts15       | TCA ACA TCG TGG TGG TCA AGG    | CCG CAT AGG TCC TGT CTG GTG         |
| Atxn3          | AAG TCG CCA GGA AAT CGA CA     | GCT GCT GCT GTT GCT TTT CAA         |
| Btg2           | GCA CTG ACC GAT CAT TAC AAA CA | CAC CTT GCT GAT GAT GGG GT          |
| Daam1          | CTC CGG GGC CAG TAG AGT AT     | CCG GCT CCA TTG TCT GAA GT          |
| Esrrg          | CGG GCT CTG TCA AGG AAA CT     | AGA GAA GCT CTT CTT CGT AGT GC      |
| Jhdm1d         | ACT GGC ACA GGC ATG ACT AC     | CAT CGG CAC TTG GGA AGA CT          |
| Lifr           | CGG CCA AGA AAT CCA TAA CT     | AAC GAA GTC GGA TCA TGA GG          |
| Mfn1           | ATT GCC ACA AGC TGT GTT CG     | CTA GGG ACC TGA AAG ATG GGC         |
| Pafah1b1       | GCG AAC TCT CAA GGG CCA TA     | CAT TGT GAT CGT GAC CGT GC          |
| Slc38a9        | GAT TGG CCT GCT GAG GAC TG     | GCC CAG GGC TTA CTT CAT GT          |
| Gapdh          | ACCCAG AAGACTGTGGATGG          | CACATTGGGGGTAGGAACAC                |
| 2610203C20     | CTCCTGGAAGCTCTGCAACTATGC       | TGGAGAGA AATGCTCTTTCTAACT           |
| $\beta$ -actin | CACAGTGTTGTCTGGTGGTA           | GACTCATCGTACTCCTGCTT                |
